# Supplementary material for: Stepwise assembly of metal–organic framework based on a metal–organic polyhedron precursor for drug delivery
Source: Royal Society of Chemistry journal article supplement (doi:10.1039/c1cc11932j), 2011-01-01
Supplement: c1cc11932j.pdf [file c1cc11932j.pdf]

## Supporting Information

### Stepwise Assembly of Metal–Organic Framework Based on a Metal–Organic Polyhedron Precursor for Drug Delivery

Hai-Ning Wang, Xing Meng, Guang-Sheng Yang, Xin-Long Wang\*, Kui-Zhan Shao,  
Zhong-Min Su\*, and Chun-Gang Wang

*Institute of Functional Material Chemistry, Department of Chemistry, Northeast  
Normal University, Changchun 130024, P. R. China*

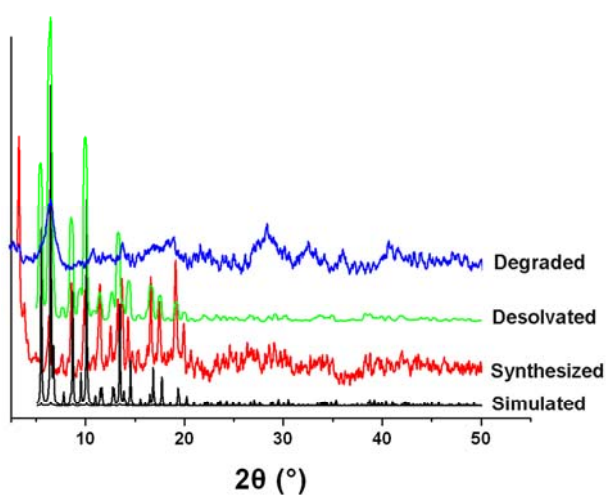

**Fig. S1** Experimental and simulated powder X-Ray diffraction patterns for **2**. The blue line represents the PXRD pattern of **2** after the drug release experiments.

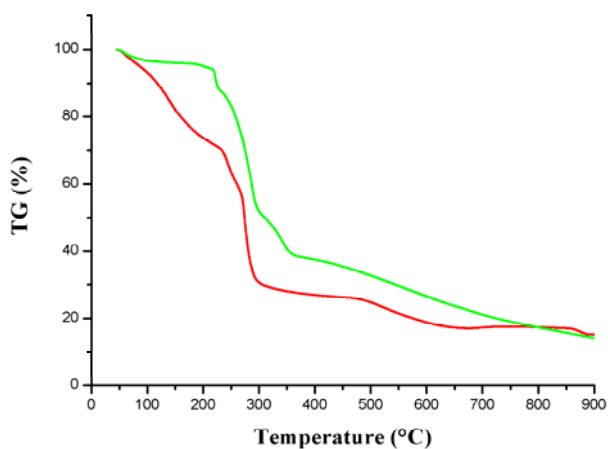

**Fig. S2** TG profiles of **2** (red) and evacuated **2** (green).

**Drug Loading** Dissolving 5-FU (30 mg) and **2** (20 mg) in methanol (5 mL) three days yielded heterogeneous green solution. The precipitation was isolated by centrifuging and washed with methanol. The 5-FU content was calculated using UV method ( $\lambda = 266$  nm).

**Drug Release** 7 mg of drug-loaded **2** was dissolved into 2 mL of PBS buffer solution (pH 7.4), and loaded into a dialysis bag, which was dialyzed against 5 mL of deionized water at 37°C. During each time interval, about 1 mL of the solution was pulled out to test, and decanted back when the test was over. The content of 5-FU in the samples taken out was monitored by fluorometry, in which the detection wavelength was 453 nm.
